# Supplementary material for: Artificial Neural Network as a Tool for Estimation of the Higher Heating Value of Miscanthus Based on Ultimate Analysis
Source: MDPI journal article supplement (doi:10.3390/math10203732), 2022-10-11
Supplement: s1 [file s1]

Table S1. Result of ultimate analysis and HHV of miscanthus biomass

| Sample | Harvest | N (%) | C (%) | S (%) | H (%) | O (%) | HHV (MJ kg <sup>-1</sup> ) |
|--------|---------|-------|-------|-------|-------|-------|----------------------------|
| MxG 1  | 1.      | 0.28  | 51.6  | 0.08  | 5.93  | 42.11 | 17.39                      |
| MxG 1  | 1.      | 0.24  | 52.02 | 0.06  | 6.08  | 41.6  | 17.64                      |
| MxG 1  | 1.      | 0.27  | 51.81 | 0.07  | 6.01  | 41.85 | 17.44                      |
| MxG 2  | 1.      | 0.3   | 51.03 | 0.06  | 6.12  | 42.5  | 18.19                      |
| MxG 2  | 1.      | 0.27  | 50.7  | 0.06  | 6.03  | 42.93 | 17.97                      |
| MxG 2  | 1.      | 0.29  | 50.86 | 0.06  | 6.07  | 42.72 | 17.97                      |
| MxG 3  | 1.      | 0.28  | 49.84 | 0.06  | 5.99  | 43.83 | 18.03                      |
| MxG 3  | 1.      | 0.26  | 49.45 | 0.06  | 5.99  | 44.24 | 17.99                      |
| MxG 3  | 1.      | 0.27  | 49.64 | 0.06  | 5.99  | 44.04 | 17.99                      |
| MxG 4  | 1.      | 0.23  | 51.27 | 0.06  | 6.06  | 42.37 | 17.52                      |
| MxG 4  | 1.      | 0.23  | 51.25 | 0.06  | 6.08  | 42.37 | 17.63                      |
| MxG 4  | 1.      | 0.23  | 51.26 | 0.06  | 6.07  | 42.37 | 17.52                      |
| MxG 5  | 1.      | 0.24  | 50.58 | 0.06  | 6.11  | 43.02 | 18.13                      |
| MxG 5  | 1.      | 0.25  | 50.56 | 0.06  | 6.1   | 43.04 | 18.05                      |
| MxG 5  | 1.      | 0.24  | 50.57 | 0.06  | 6.1   | 43.03 | 18.08                      |
| MxG 6  | 1.      | 0.32  | 50.54 | 0.06  | 6.06  | 43.02 | 18.29                      |
| MxG 6  | 1.      | 0.32  | 50.63 | 0.06  | 6.14  | 42.85 | 18.46                      |
| MxG 6  | 1.      | 0.32  | 50.58 | 0.06  | 6.1   | 42.94 | 18.3                       |
| MxG 7  | 1.      | 0.27  | 50.43 | 0.06  | 6.05  | 43.19 | 16.98                      |
| MxG 7  | 1.      | 0.28  | 50.09 | 0.06  | 6.02  | 43.55 | 17.02                      |
| MxG 7  | 1.      | 0.28  | 50.26 | 0.06  | 6.03  | 43.37 | 16.99                      |
| MxG 8  | 1.      | 0.27  | 49.56 | 0.06  | 6.04  | 44.08 | 17.64                      |
| MxG 8  | 1.      | 0.26  | 49.91 | 0.06  | 6.08  | 43.7  | 17.59                      |
| MxG 8  | 1.      | 0.26  | 49.73 | 0.06  | 6.06  | 43.89 | 17.59                      |
| MxG 9  | 1.      | 0.32  | 51.22 | 0.06  | 6.12  | 42.27 | 18.23                      |
| MxG 9  | 1.      | 0.34  | 51.6  | 0.06  | 6.17  | 41.83 | 18.1                       |
| MxG 9  | 1.      | 0.33  | 51.41 | 0.06  | 6.14  | 42.05 | 18.1                       |
| MxG 10 | 1.      | 0.25  | 50.28 | 0.06  | 6.07  | 43.34 | 17.41                      |
| MxG 10 | 1.      | 0.27  | 50.43 | 0.06  | 6.09  | 43.16 | 17.65                      |
| MxG 10 | 1.      | 0.26  | 50.36 | 0.06  | 6.08  | 43.25 | 17.58                      |
| MxG 11 | 1.      | 0.42  | 49.73 | 0.07  | 5.97  | 43.82 | 17.71                      |
| MxG 11 | 1.      | 0.39  | 49.9  | 0.06  | 6     | 43.65 | 17.85                      |
| MxG 11 | 1.      | 0.41  | 49.81 | 0.07  | 5.99  | 43.73 | 17.74                      |
| MxG 12 | 1.      | 0.29  | 51.57 | 0.06  | 6.17  | 41.91 | 17.65                      |
| MxG 12 | 1.      | 0.28  | 51.36 | 0.06  | 6.13  | 42.18 | 17.81                      |
| MxG 12 | 1.      | 0.29  | 51.46 | 0.06  | 6.15  | 42.04 | 17.82                      |
| MxG 13 | 1.      | 0.32  | 50.04 | 0.07  | 6.06  | 43.52 | 17.61                      |
| MxG 13 | 1.      | 0.29  | 50.68 | 0.07  | 6.11  | 42.86 | 17.41                      |
| MxG 13 | 1.      | 0.31  | 50.36 | 0.07  | 6.08  | 43.19 | 17.58                      |
| MxG 14 | 1.      | 0.19  | 51.63 | 0.06  | 6.12  | 42.01 | 17.49                      |
| MxG 14 | 1.      | 0.2   | 51.34 | 0.06  | 6.08  | 42.33 | 17.65                      |
| MxG 14 | 1.      | 0.19  | 51.48 | 0.06  | 6.1   | 42.17 | 17.44                      |

|        |    |      |       |      |      |       |       |
|--------|----|------|-------|------|------|-------|-------|
| MxG 15 | 1. | 0.31 | 51.38 | 0.06 | 6.11 | 42.14 | 17.58 |
| MxG 15 | 1. | 0.29 | 51.52 | 0.06 | 6.1  | 42.04 | 17.88 |
| MxG 15 | 1. | 0.3  | 51.45 | 0.06 | 6.1  | 42.09 | 17.75 |
| MxG 16 | 1. | 0.27 | 50.07 | 0.06 | 6.06 | 43.55 | 17.55 |
| MxG 16 | 1. | 0.27 | 49.85 | 0.06 | 6    | 43.82 | 17.42 |
| MxG 16 | 1. | 0.27 | 49.96 | 0.06 | 6.03 | 43.68 | 17.57 |
| MxG 1  | 2. | 0.09 | 52.19 | 0.06 | 6.11 | 41.57 | 17.95 |
| MxG 1  | 2. | 0.09 | 52.25 | 0.14 | 6.13 | 41.39 | 18.99 |
| MxG 1  | 2. | 0.08 | 52.14 | 0.1  | 6.12 | 41.56 | 17.78 |
| MxG 2  | 2. | 0.03 | 51.73 | 0.13 | 5.9  | 42.21 | 17.66 |
| MxG 2  | 2. | 0.03 | 52.27 | 0.09 | 6.02 | 41.58 | 17.49 |
| MxG 2  | 2. | 0.03 | 51.96 | 0.1  | 5.96 | 41.95 | 17.85 |
| MxG 3  | 2. | 0.04 | 51.9  | 0.13 | 5.91 | 42.02 | 17.49 |
| MxG 3  | 2. | 0.05 | 52.3  | 0.1  | 6.09 | 41.47 | 17.43 |
| MxG 3  | 2. | 0.38 | 52.02 | 0.12 | 5.96 | 41.53 | 17.42 |
| MxG 4  | 2. | 0.05 | 52.56 | 0.1  | 6.1  | 41.19 | 17.97 |
| MxG 4  | 2. | 0.05 | 52.76 | 0.1  | 6.14 | 40.96 | 17.54 |
| MxG 4  | 2. | 0.05 | 52.63 | 0.1  | 6.13 | 41.09 | 17.64 |
| MxG 5  | 2. | 0.07 | 52.56 | 0.1  | 6.15 | 41.12 | 17.63 |
| MxG 5  | 2. | 0.07 | 52.62 | 0.1  | 6.13 | 41.09 | 17.92 |
| MxG 5  | 2. | 0.07 | 52.6  | 0.1  | 6.14 | 41.09 | 17.81 |
| MxG 6  | 2. | 0.04 | 52.5  | 0.14 | 5.98 | 41.35 | 17.55 |
| MxG 6  | 2. | 0.03 | 52.37 | 0.1  | 6.13 | 41.37 | 17.68 |
| MxG 6  | 2. | 0.04 | 52.5  | 0.1  | 6.02 | 41.35 | 17.6  |
| MxG 7  | 2. | 0.05 | 52.56 | 0.09 | 6.14 | 41.16 | 17.44 |
| MxG 7  | 2. | 0.05 | 52.78 | 0.09 | 6.16 | 40.91 | 17.88 |
| MxG 7  | 2. | 0.05 | 52.58 | 0.09 | 6.15 | 41.13 | 17.63 |
| MxG 8  | 2. | 0.07 | 52.99 | 0.1  | 6.15 | 40.69 | 17.36 |
| MxG 8  | 2. | 0.07 | 52.76 | 0.09 | 6.14 | 40.94 | 17.9  |
| MxG 8  | 2. | 0.07 | 52.79 | 0.09 | 6.13 | 40.92 | 17.71 |
| MxG 9  | 2. | 0.07 | 52.9  | 0.1  | 6.15 | 40.78 | 18.25 |
| MxG 9  | 2. | 0.07 | 53.06 | 0.1  | 6.16 | 40.61 | 17.93 |
| MxG 9  | 2. | 0.07 | 52.94 | 0.1  | 6.14 | 40.75 | 17.85 |
| MxG 10 | 2. | 0.04 | 52.67 | 0.09 | 6.1  | 41.1  | 17.41 |
| MxG 10 | 2. | 0.05 | 52.6  | 0.1  | 6.09 | 41.16 | 18.01 |
| MxG 10 | 2. | 0.05 | 52.62 | 0.1  | 6.11 | 41.13 | 17.21 |
| MxG 11 | 2. | 0.06 | 52.75 | 0.09 | 6.17 | 40.93 | 17.58 |
| MxG 11 | 2. | 0.06 | 52.75 | 0.1  | 6.16 | 40.94 | 17.86 |
| MxG 11 | 2. | 0.06 | 52.75 | 0.1  | 6.18 | 40.92 | 17.8  |
| MxG 12 | 2. | 0.06 | 52.92 | 0.09 | 6.2  | 40.73 | 18.91 |
| MxG 12 | 2. | 0.08 | 52.83 | 0.09 | 6.13 | 40.88 | 18.64 |
| MxG 12 | 2. | 0.07 | 52.9  | 0.09 | 6.14 | 40.81 | 18.93 |
| MxG 13 | 2. | 0.08 | 52.1  | 0.11 | 6.13 | 41.59 | 17.99 |
| MxG 13 | 2. | 0.06 | 52.66 | 0.1  | 6.16 | 41.02 | 17.76 |
| MxG 13 | 2. | 0.07 | 52.36 | 0.1  | 6.17 | 41.3  | 17.85 |
| MxG 14 | 2. | 0.08 | 52.78 | 0.09 | 6.1  | 40.95 | 18.06 |

|        |    |      |       |      |      |       |       |
|--------|----|------|-------|------|------|-------|-------|
| MxG 14 | 2. | 0.07 | 52.69 | 0.1  | 6.14 | 41    | 17.89 |
| MxG 14 | 2. | 0.08 | 52.74 | 0.09 | 6.13 | 40.96 | 17.92 |
| MxG 15 | 2. | 0.05 | 53.12 | 0.09 | 6.17 | 40.57 | 17.49 |
| MxG 15 | 2. | 0.06 | 53.42 | 0.09 | 6.23 | 40.2  | 17.93 |
| MxG 15 | 2. | 0.54 | 53.27 | 0.09 | 6.19 | 39.91 | 17.69 |
| MxG 16 | 2. | 0.04 | 53.2  | 0.09 | 6.21 | 40.46 | 17.65 |
| MxG 16 | 2. | 0.03 | 52.95 | 0.09 | 6.17 | 40.75 | 17.86 |
| MxG 16 | 2. | 0.04 | 52.04 | 0.09 | 6.19 | 41.65 | 17.66 |
| MxG 1  | 3. | 0.47 | 51.12 | 0.15 | 5.84 | 42.44 | 18.53 |
| MxG 1  | 3. | 0.45 | 50.61 | 0.15 | 5.8  | 42.98 | 18.5  |
| MxG 1  | 3. | 0.46 | 50.83 | 0.15 | 5.82 | 42.74 | 18.51 |
| MxG 2  | 3. | 0.28 | 50.91 | 0.2  | 5.76 | 42.85 | 18.48 |
| MxG 2  | 3. | 0.37 | 50.67 | 0.22 | 5.79 | 42.94 | 18.55 |
| MxG 2  | 3. | 0.3  | 50.88 | 0.21 | 5.77 | 42.84 | 18.44 |
| MxG 3  | 3. | 0.35 | 50.51 | 0.23 | 5.77 | 43.14 | 18.49 |
| MxG 3  | 3. | 0.44 | 50.56 | 0.21 | 5.79 | 43.01 | 18.52 |
| MxG 3  | 3. | 0.39 | 50.52 | 0.21 | 5.78 | 43.1  | 18.4  |
| MxG 4  | 3. | 0.43 | 50.89 | 0.2  | 5.79 | 42.69 | 18.66 |
| MxG 4  | 3. | 0.35 | 50.94 | 0.23 | 5.8  | 42.68 | 18.83 |
| MxG 4  | 3. | 0.4  | 50.91 | 0.2  | 5.77 | 42.71 | 18.79 |
| MxG 5  | 3. | 0.28 | 51.08 | 0.26 | 5.8  | 42.58 | 18.63 |
| MxG 5  | 3. | 0.35 | 50.82 | 0.25 | 5.73 | 42.86 | 18.63 |
| MxG 5  | 3. | 0.3  | 50.99 | 0.24 | 5.71 | 42.76 | 18.63 |
| MxG 6  | 3. | 0.31 | 51.03 | 0.22 | 5.8  | 42.63 | 18.6  |
| MxG 6  | 3. | 0.42 | 50.85 | 0.23 | 5.75 | 42.74 | 18.6  |
| MxG 6  | 3. | 0.41 | 50.74 | 0.22 | 5.82 | 42.81 | 18.6  |
| MxG 7  | 3. | 0.39 | 50.9  | 0.33 | 5.67 | 42.71 | 18.48 |
| MxG 7  | 3. | 0.29 | 50.81 | 0.18 | 5.76 | 42.97 | 18.47 |
| MxG 7  | 3. | 0.38 | 50.88 | 0.28 | 5.77 | 42.69 | 18.48 |
| MxG 8  | 3. | 0.35 | 51.26 | 0.2  | 5.86 | 42.33 | 18.66 |
| MxG 8  | 3. | 0.32 | 51.31 | 0.2  | 5.83 | 42.34 | 18.75 |
| MxG 8  | 3. | 0.34 | 51.29 | 0.2  | 5.84 | 42.33 | 18.77 |
| MxG 9  | 3. | 0.35 | 51.07 | 0.2  | 5.82 | 42.56 | 18.71 |
| MxG 9  | 3. | 0.28 | 50.95 | 0.19 | 5.77 | 42.81 | 18.68 |
| MxG 9  | 3. | 0.29 | 51.01 | 0.21 | 5.81 | 42.68 | 18.72 |
| MxG 10 | 3. | 0.29 | 50.81 | 0.2  | 5.79 | 42.92 | 18.71 |
| MxG 10 | 3. | 0.3  | 50.71 | 0.19 | 5.83 | 42.98 | 18.64 |
| MxG 10 | 3. | 0.29 | 50.88 | 0.19 | 5.78 | 42.86 | 18.69 |
| MxG 11 | 3. | 0.31 | 50.56 | 0.19 | 5.77 | 43.18 | 18.42 |
| MxG 11 | 3. | 0.2  | 50.43 | 0.19 | 5.8  | 43.39 | 18.4  |
| MxG 11 | 3. | 0.39 | 50.49 | 0.18 | 5.77 | 43.17 | 18.44 |
| MxG 12 | 3. | 0.28 | 50.95 | 0.22 | 5.81 | 42.74 | 18.53 |
| MxG 12 | 3. | 0.3  | 50.63 | 0.2  | 5.75 | 43.12 | 18.49 |
| MxG 12 | 3. | 0.3  | 50.7  | 0.21 | 5.79 | 43    | 18.55 |
| MxG 13 | 3. | 0.71 | 50.84 | 0.37 | 5.44 | 42.65 | 18.58 |
| MxG 13 | 3. | 0.41 | 50.83 | 0.18 | 5.67 | 42.92 | 18.59 |

|        |    |      |       |      |      |       |       |
|--------|----|------|-------|------|------|-------|-------|
| MxG 13 | 3. | 0.65 | 50.8  | 0.26 | 5.56 | 42.74 | 18.6  |
| MxG 14 | 3. | 0.33 | 50.66 | 0.11 | 5.67 | 43.22 | 15.53 |
| MxG 14 | 3. | 0.45 | 50.54 | 0.18 | 5.7  | 43.12 | 18.44 |
| MxG 14 | 3. | 0.47 | 50.49 | 0.12 | 0    | 48.92 | 18.53 |
| MxG 15 | 3. | 0.39 | 50.78 | 0.15 | 5.74 | 42.94 | 18.58 |
| MxG 15 | 3. | 0.34 | 50.66 | 0.15 | 5.73 | 43.11 | 18.48 |
| MxG 15 | 3. | 0.35 | 50.7  | 0.15 | 5.74 | 43.06 | 18.56 |
| MxG 16 | 3. | 0.26 | 50.5  | 0.15 | 5.76 | 43.32 | 18.5  |
| MxG 16 | 3. | 0.33 | 50.4  | 0.18 | 5.72 | 43.38 | 18.5  |
| MxG 16 | 3. | 0.37 | 50.6  | 0.17 | 5.75 | 43.11 | 18.5  |
| MxG 1  | 4. | 0.19 | 51.05 | 0.12 | 5.23 | 43.41 | 18.54 |
| MxG 1  | 4. | 0.12 | 51.18 | 0.18 | 5.5  | 43.02 | 18.62 |
| MxG 1  | 4. | 0.16 | 51.12 | 0.11 | 5.31 | 43.3  | 18.59 |
| MxG 2  | 4. | 0.12 | 51.53 | 0.18 | 5.62 | 42.55 | 18.59 |
| MxG 2  | 4. | 0.1  | 51.55 | 0.16 | 5.52 | 42.67 | 18.27 |
| MxG 2  | 4. | 0.1  | 51.52 | 0.18 | 5.59 | 42.61 | 18.46 |
| MxG 3  | 4. | 0.07 | 51.33 | 0.17 | 5.59 | 42.84 | 19.08 |
| MxG 3  | 4. | 0.1  | 51.38 | 0.17 | 5.48 | 42.87 | 18.79 |
| MxG 3  | 4. | 0.1  | 51.35 | 0.17 | 5.52 | 42.86 | 18.97 |
| MxG 4  | 4. | 0.2  | 52.22 | 0.13 | 5.34 | 42.12 | 19.04 |
| MxG 4  | 4. | 0.21 | 52.12 | 0.12 | 5.34 | 42.2  | 18.73 |
| MxG 4  | 4. | 0.2  | 52.18 | 1.13 | 5.34 | 41.15 | 18.95 |
| MxG 5  | 4. | 0.15 | 51.44 | 0.14 | 5.25 | 43.02 | 18.91 |
| MxG 5  | 4. | 0.16 | 51.32 | 0.18 | 5.49 | 42.84 | 19.01 |
| MxG 5  | 4. | 0.16 | 51.39 | 0.17 | 5.39 | 42.9  | 18.96 |
| MxG 6  | 4. | 0.77 | 52.26 | 0.68 | 5.82 | 40.47 | 19.25 |
| MxG 6  | 4. | 0.25 | 52.19 | 0.14 | 5.35 | 42.07 | 19.22 |
| MxG 6  | 4. | 0.46 | 52.21 | 0.55 | 5.68 | 41.11 | 19.23 |
| MxG 7  | 4. | 0.12 | 51.54 | 0.09 | 5.27 | 42.98 | 18.72 |
| MxG 7  | 4. | 0.1  | 51.55 | 0.08 | 5.41 | 42.87 | 18.77 |
| MxG 7  | 4. | 0.11 | 51.56 | 0.08 | 5.36 | 42.89 | 18.74 |
| MxG 8  | 4. | 0.13 | 52.83 | 0.06 | 5.48 | 41.5  | 18.98 |
| MxG 8  | 4. | 0.12 | 52.7  | 0.11 | 5.48 | 41.59 | 18.86 |
| MxG 8  | 4. | 0.13 | 52.71 | 0.09 | 5.47 | 41.6  | 18.94 |
| MxG 9  | 4. | 0.14 | 51.72 | 0.14 | 5.29 | 42.71 | 18.64 |
| MxG 9  | 4. | 0.13 | 51.59 | 0.15 | 5.32 | 42.81 | 18.44 |
| MxG 9  | 4. | 0.14 | 51.64 | 0.15 | 5.36 | 42.71 | 18.58 |
| MxG 10 | 4. | 0.13 | 52.14 | 0.09 | 5.28 | 42.36 | 18.64 |
| MxG 10 | 4. | 0.13 | 52.12 | 0.12 | 5.32 | 42.31 | 18.58 |
| MxG 10 | 4. | 0.12 | 52.11 | 0.1  | 5.39 | 42.28 | 18.62 |
| MxG 11 | 4. | 0.1  | 51.31 | 0.09 | 5.4  | 43.11 | 18.36 |
| MxG 11 | 4. | 0.1  | 51.29 | 0.1  | 5.5  | 43.02 | 18.28 |
| MxG 11 | 4. | 0.11 | 51.29 | 0.09 | 5.51 | 43    | 18.31 |
| MxG 12 | 4. | 0.11 | 51.28 | 0.08 | 5.35 | 43.19 | 18.76 |
| MxG 12 | 4. | 0.11 | 51.32 | 0.14 | 5.32 | 43.11 | 19.14 |
| MxG 12 | 4. | 0.11 | 51.29 | 0.1  | 5.34 | 43.16 | 18.93 |

|        |    |      |       |      |      |       |       |
|--------|----|------|-------|------|------|-------|-------|
| MxG 13 | 4. | 0.12 | 51.05 | 0.16 | 5.39 | 43.27 | 18.99 |
| MxG 13 | 4. | 0.14 | 51.04 | 0.13 | 5.31 | 43.37 | 18.98 |
| MxG 13 | 4. | 0.14 | 51.02 | 0.15 | 5.37 | 43.32 | 18.98 |
| MxG 14 | 4. | 0.09 | 51.37 | 0.09 | 5.29 | 43.16 | 18.29 |
| MxG 14 | 4. | 0.11 | 51.35 | 0.08 | 5.21 | 43.26 | 18.39 |
| MxG 14 | 4. | 0.1  | 51.34 | 0.08 | 5.23 | 43.24 | 18.34 |
| MxG 15 | 4. | 0.11 | 51.47 | 0.14 | 5.31 | 42.97 | 18.39 |
| MxG 15 | 4. | 0.12 | 51.49 | 0.19 | 5.25 | 42.95 | 18.35 |
| MxG 15 | 4. | 0.11 | 51.48 | 0.17 | 5.28 | 42.96 | 18.35 |
| MxG 16 | 4. | 0.11 | 51.29 | 0.07 | 5.32 | 43.22 | 18.39 |
| MxG 16 | 4. | 0.09 | 51.2  | 0.19 | 5.36 | 43.16 | 18.27 |
| MxG 16 | 4. | 0.1  | 51.25 | 0.13 | 5.38 | 43.14 | 18.35 |
